# Supplementary material
Source: publisher figshare collection journal article supplement (https://tandf.figshare.com/ndownloader/files/13078946)
Supplement: Supplementary file 1 [file 13078946]

Utilization of waste medicine wrappers as an efficient low-cost electrode material for microbial fuel cell

Md. T. Noori1, G. D. Bhowmick1, B. R. Tiwari2,I. Das2, M. M. Ghangrekar2* and C. K. Mukherjee1

1Department of Agricultural and Food Engineering, Indian Institute of Technology Kharagpur, 721302, India.

2Department of Civil Engineering, Indian Institute of Technology Kharagpur, 721302, India.

(*Corresponding author- Tel. +91-3222-283440; Email- ghangrekar@civil.iitkgp.ernet.in)

**Supplementary information**

**Preliminary performance evaluation data for MFC-4 and 5**

MFC-4 and MFC-5 had WMW as cathode and WMW and carbon felt as anode, respectively. Preliminary investigation results for 15 days of these MFCs based on OV and OCV as shown in Fig. S3 demonstrated poor performance with an average OV of 11.8 ± 5.4 mV for MFC-4 and 10.6 ± 4.1 for MFC-5. The standard deviations associated to these results clearly indicate high fluctuation in daily observation results.

**Fig. S1.** Voltage profile of MFC-4 and MFC-5.
